# Supplementary material for: Multi-informant path models of the influence of psychosocial and treatment-related variables on adherence and metabolic control in adolescents with type 1 diabetes mellitus
Source: PLOS journal article supplement (doi:10.1371/journal.pone.0204176), 2018-09-20

**S1 Fig. Study inclusion**

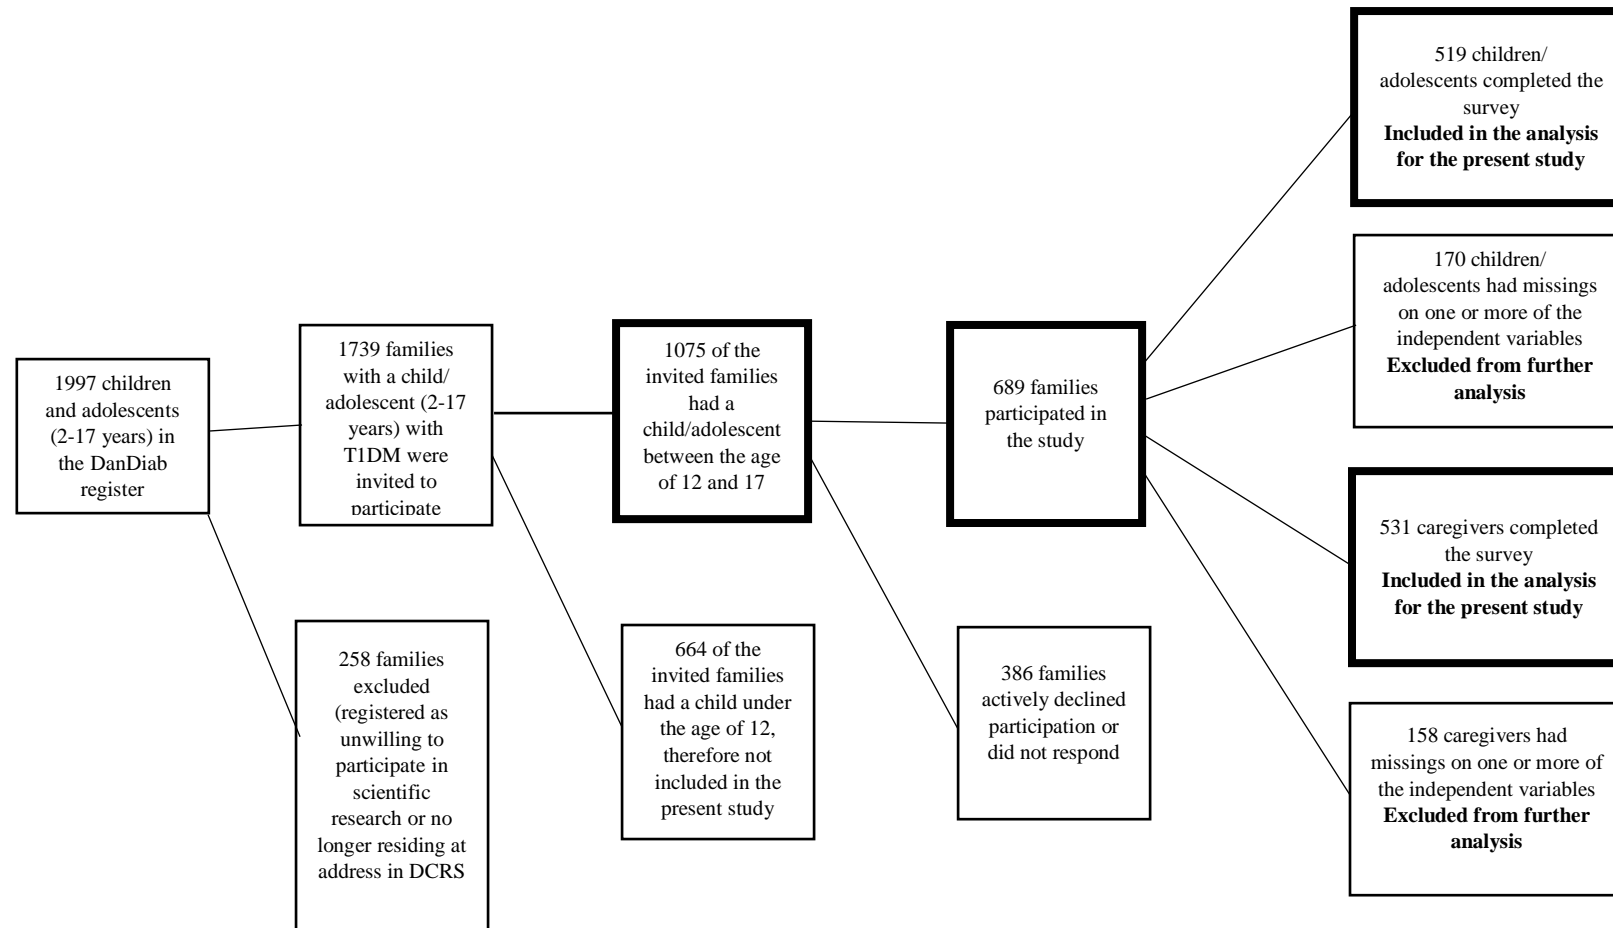

Supplement: S1 (10.1371/journal.pone.0204176.s001) [file journal.pone.0204176.s001]
